# Supplementary material for: Tuning the hydrogen evolution activity of MS2 (M = Mo or Nb) monolayers by strain engineering
Source: Royal Society of Chemistry journal article supplement (doi:10.1039/c5cp06475a), 2016-01-01
Supplement: c5cp06475a1.pdf [file c5cp06475a1.pdf]

## Supplementary Information: Tuning the hydrogen evolution activity of MS<sub>2</sub> (M = Mo or Nb) monolayers by strain engineering

Xiaobo Chen<sup>\*a</sup> and Guangjin Wang<sup>\*b</sup>

<sup>a</sup>Department of Physics and Siyuan Laboratory, College of Science and Engineering, Jinan University, Guangzhou 510632, China.

<sup>b</sup>State Key Laboratory of Advanced Technology for Materials Synthesis and Processing, Wuhan University of Technology, Wuhan 430070, China.

\*Corresponding author: [txbchen@jnu.edu.cn](mailto:txbchen@jnu.edu.cn), [wangguangjin@whut.edu.cn](mailto:wangguangjin@whut.edu.cn)

### 1. Data for $\Delta G$ calculations

Table S1. Total energies for a isolated H atom  $E(\text{H})$ , a H atom in gas molecular state ( $E(\text{H}_2)/2$ ), and their difference  $\Delta E_{\text{cp}}$ .  $E_{\text{ZPE}}(\text{gas})$  and  $E_{\text{ZPE}}(\text{ads})$  are the zero point energies of a H atom in gas molecular state and adsorbed state, respectively. The calculated  $E_{\text{ZPE}}(\text{gas})$  is 0.137 eV, in good agreement with the previous value of 0.135 eV.<sup>1</sup>  $T\Delta S_{\text{H}}$  is obtained from the literature.<sup>1</sup>

|                     | $E(\text{H})$ | $E(\text{H}_2)/2$ | $\Delta E_{\text{cp}}$ | $E_{\text{ZPE}}(\text{gas})$ | $E_{\text{ZPE}}(\text{ads})$ | $T\Delta S_{\text{H}}$ | $\Delta E_{\text{ZPE}} - T\Delta S_{\text{H}}$ |
|---------------------|---------------|-------------------|------------------------|------------------------------|------------------------------|------------------------|------------------------------------------------|
| 1H-MoS <sub>2</sub> |               |                   |                        |                              | 0.194                        |                        | 0.262                                          |
| 1T-MoS <sub>2</sub> | -0.000488     | -3.380413         | 3.380                  | 0.137                        | 0.228                        | -0.205                 | 0.296                                          |
| 1H-NbS <sub>2</sub> |               |                   |                        |                              | 0.229                        |                        | 0.297                                          |
| 1T-NbS <sub>2</sub> |               |                   |                        |                              | 0.229                        |                        | 0.297                                          |

All the total energies calculated by VASP are with respect to the atomic energies in reference configuration (*i.e.* the configuration for which the pseudopotential is generated). Consequently,  $E(\text{H})$  should be as small as possible. The small value of -0.000488 eV for  $E(\text{H})$  indicates the high accuracy of the PAW potential. In addition, it is seen that  $E_{\text{ZPE}}(\text{ads})$  is weakly dependent on different materials.

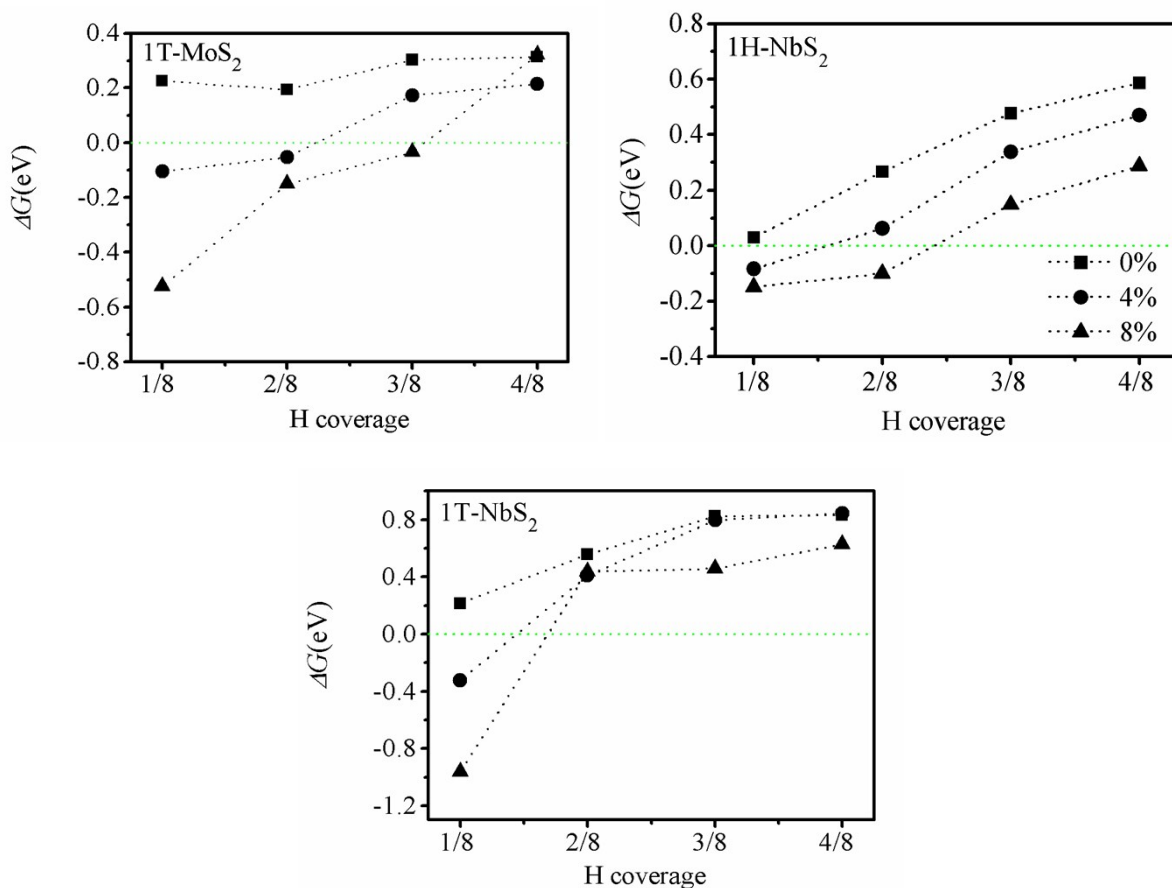

Fig. S1 (color online) H coverage dependent differential  $\Delta G$  for monolayer 1T-MoS<sub>2</sub>, 1H-NbS<sub>2</sub> and 1T-NbS<sub>2</sub> for biaxial tensile strain of 0% (squares), 4% (circles) and 8% (triangles). Only H coverage from 1/8 to 4/8 is considered.

Generally,  $\Delta G$  increases with increasing H coverage for all the monolayer disulfides. For a given disulfide, the evolution of  $\Delta G$  with H coverage, as indicated by dotted lines, may cross the green horizontal lines ( $\Delta G = 0$ ). The coverage corresponding to the crossover is selected to be the max coverage of H (MCH) defined in the text. This may lead to an average error of *ca.*  $\pm 1/16$  for the MCH.

## REFERENCES

1. J. K. Nørskov, T. Bligaard, A. Logadottir, J. R. Kitchin, J. G. Chen, S. Pandelov and U. Stimming, *J. Electrochem. Soc.*, 2005, **152**, J23-J26.
